# Supplementary material
Source: publisher figshare collection journal article supplement (https://gsajournals.figshare.com/ndownloader/files/15193409)
Supplement: Supplementary file 1 [file 15193409]

| ReTi Tc-ACT fwd | TGTGACGAATTGGGACGATA |
| --- | --- |
| ReTi Tc-ACT rev | TTCGAACATGATTTGGGTCA |
| ReTi Tc-RpSL32 fwd | GGCACCAGTCTGACCGTTAT |
| ReTi Tc-RpSL32 Rev | GGGTAGCATGTGCTTCGTTT |
| ReTi Tc-Tub.β2(658517)fwd | GCATGGACGAAATGGAGTTT |
| ReTi Tc-Tub.β2(658517)Rev | ATCGGTCCAATACACCGTTC |
| ReTi Tc-Tub.β2(655614)fwd | AGAAGCCGAAGTTGACGAGA |
| ReTi Tc-Tub.β2(655614)Rev | TAATGGCAGCGACCGTTT |
| ReTi Tc-Tub.β2(655694)fwd | GCTGCTATGTTTAGACGCAAA |
| ReTi Tc-Tub.β2(655694)Re | CTCTTCCTCGGCCTCGTACT |
| ReTi Tc-Tub.β2(656712) fwd | TTCACAGAGGCTGAAAGCAA |
| ReTi Tc-Tub.β2(656712)Rev | CATGCACAGGCCTCTTACAA |
| ReTi fdw (Rad50 ATPase) | GGAGGAGTACGAGGCGAAA |
| ReTi rev (Rad50 ATPase) | CGTTTGTTGGCTCTCCCTAA |
| ReTI fwd (Enolase-like Protein) | GTTTGTTCCGAGCAGCTGTA |
| ReTI rev (Enolase-like Protein) | TTGCGTTACCTCCAAGTGTG |
|  |  |

Supplementary Table 1: Primer list used for qPCR analysis in this study.
